# Supplementary material
Source: Springer Nature journal article supplement (https://www.springermedizin.de/resource/supplementary/12888_2012_1227_MOESM1_ESM.pdf/9480438)
Supplement: MOESM1 [file 9480438]

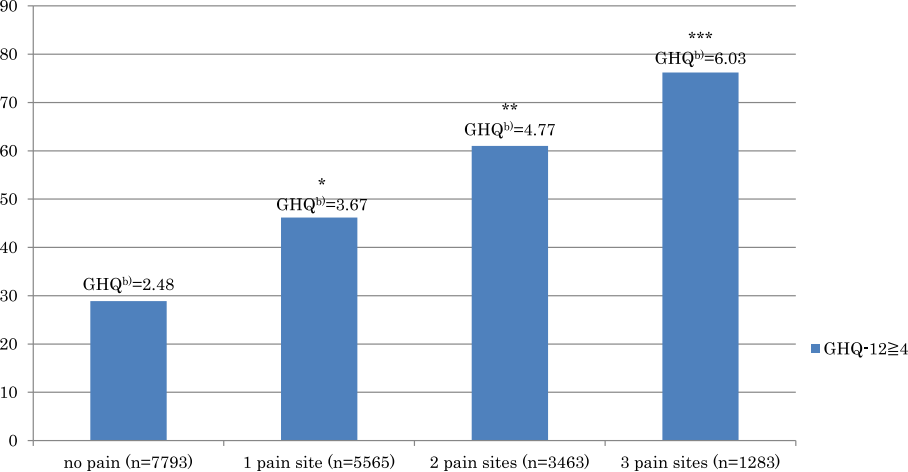

**Number of pain sites**

\* odds ratio<sup>a</sup>=1.84 (1.70-2.00), compared with no pain

\*\* odds ratio<sup>a</sup>=3.09 (2.80-3.40), compared with no pain

\*\*\* odds ratio<sup>a</sup>=5.43 (4.65-6.35), compared with no pain
